# Supplementary material for: Efficacy of Two Moroccan Cistus Species Extracts against Acne Vulgaris: Phytochemical Profile, Antioxidant, Anti-Inflammatory and Antimicrobial Activities
Source: MDPI journal article supplement (doi:10.3390/molecules28062797), 2023-03-20
Supplement: s1 [file s1]

**Table S1.** Peak list and diagnostics of selected metabolites from the *Cistus* spp. extracts object of this study. See text for details.

| Peak | Rt, min <sup>a</sup> | compound tentative identification               | UV-vis data, nm <sup>b</sup> | MW   | ESI <sup>+</sup> data, m/z <sup>c</sup> |
|------|----------------------|-------------------------------------------------|------------------------------|------|-----------------------------------------|
| 1    | 6,7                  | p-coumaroyl quinic acid, isomer 1               | 314, 298sh                   | 338  | 337*(M-H), 146                          |
| 2    | 7,2                  | terflavin A anomer 1                            | 258, 377                     | 1086 | 1085(M-H) (tr)                          |
| 3    | 8,4                  | p-coumaroyl quinic acid, isomer 2               | 312, 299sh                   | 338  | 337*(M-H)                               |
| 4    | 8,4                  | cistus anomer 1                                 | 258, 382                     | 1252 | 1251(M-H) (tr)                          |
| 5    | 9,3                  | gallagic acid derivative                        | 258, 380                     | 800  | 799 (M-H), 637*                         |
| 6    | 9,9                  | p-coumaroyl glucose, isomer 1                   | 311, 298sh                   | 326  | 325*(M-H)                               |
| 7    | 10,2                 | terflavin A anomer 2                            | 258, 379                     | 1086 | 1085*(M-H)                              |
| 8    | 10,6                 | p-coumaroyl glucose, isomer 2                   | 314, 290sh                   | 326  | 325*(M-H)                               |
| 9    | 11,2                 | cistus anomer 2                                 | 258, 381                     | 1252 | 1251(M-H)                               |
| 10   | 17,6                 | myricetin hexoside derivative                   | 260,356                      | 656  | 655(M-H), 493*                          |
| 11   | 18,0                 | quercetin derivative                            | 256,354                      | 626  | 625(M-H), 611*                          |
| 12   | 19,1                 | feruloyl glucose                                | 324, 293sh                   | 356  | 355*(M-H)                               |
| 13   | 20,3                 | myricetin hexoside                              | 261,356                      | 480  | 479*(M-H)                               |
| 14   | 21,0                 | ellagic acid galloyl hexoside                   | 252,367                      | 616  | 615(M-H), 453*                          |
| 15   | 21,5                 | rutin <sup>d</sup>                              | 255, 353                     | 610  | 609*(M-H)                               |
| 16   | 24,5                 | quercetin 3- <i>O</i> -glucoside <sup>d</sup>   | 255, 354                     | 464  | 463*(M-H)                               |
| 17   | 25,1                 | quercetin 3- <i>O</i> - rhamnoside <sup>d</sup> | 255, 352                     | 448  | 447*(M-H)                               |
| 18   | 26,0                 | kaempferol hexoside                             | 264, 348                     | 448  | 447*(M-H), 285                          |
| 19   | 28,8                 | kaempferol 3- <i>O</i> -glucoside <sup>d</sup>  | 265, 347                     | 448  | 447*(M-H)                               |
| 20   | 35,9                 | myricetin <sup>d</sup>                          | 254, 370                     | 318  | 317*(M-H)                               |
| 21   | 36,9                 | luteolin hexoside-deoxyhexoside                 | 253, 266, 345                | 594  | 593(M-H),431*                           |
| 22   | 38,2                 | methyl-quercetin                                | 255, 355                     | 316  | 315*(M-H)                               |
| 23   | 38,7                 | methyl kaempferol, isomer 1                     | 266, 314                     | 300  | 299*(M-H)                               |
| 24   | 41,0                 | methyl kaempferol, isomer 2                     | 266, 341                     | 300  | 299 (M-H),599 (2M-H)                    |
| 25   | 41,8                 | methyl kaempferol, isomer 3                     | 267, 346                     | 300  | 299*(M-H)                               |
| 26   | 42,1                 | di-methyl quercetin isomer 1                    | 254, 354                     | 330  | 329(M-H), 315*                          |
| 27   | 43,1                 | luteolin <sup>d</sup>                           | 253, 264, 345                | 286  | 285*(M-H)                               |
| 28   | 43,5                 | di-methyl quercetin isomer 2                    | 255, 354                     | 330  | 329*(M-H)                               |
| 29   | 44,1                 | di-methyl quercetin isomer 3                    | 253, 354                     | 330  | 329* (M-H), 659(2M-H)                   |
| 30   | 44,8                 | methyl apigenin isomer 1                        | 268, 326                     | 284  | 283 (M-H), 269*                         |
| 31   | 44,9                 | methyl apigenin isomer 2                        | 267, 334                     | 284  | 283*(M-H)                               |
| 32   | 45,4                 | di-methyl kaempferol                            | 266, 345                     | 314  | 313 (M-H), 299*                         |
| 33   | 45,6                 | di-methyl quercetin derivative                  | 254, 353                     | 390  | 389*(M-H), 779                          |

|    |      |                      |               |     |                      |
|----|------|----------------------|---------------|-----|----------------------|
| 34 | 45,7 | methyl luteolin      | 255, 266, 354 | 300 | 299*(M-H)            |
| 35 | 48,1 | di-methyl apigenin   | 269, 330      | 300 | 299 (M-H), 269*      |
| 36 | 48,6 | di-methyl kaempferol | 267, 346      | 314 | 313 (M-H), 299, 285* |

<sup>a</sup> as mean of three replicates; <sup>b</sup> from HPLC; <sup>c</sup> base peaks marked with an asterisk; <sup>d</sup> co-injection with pure commercial standard

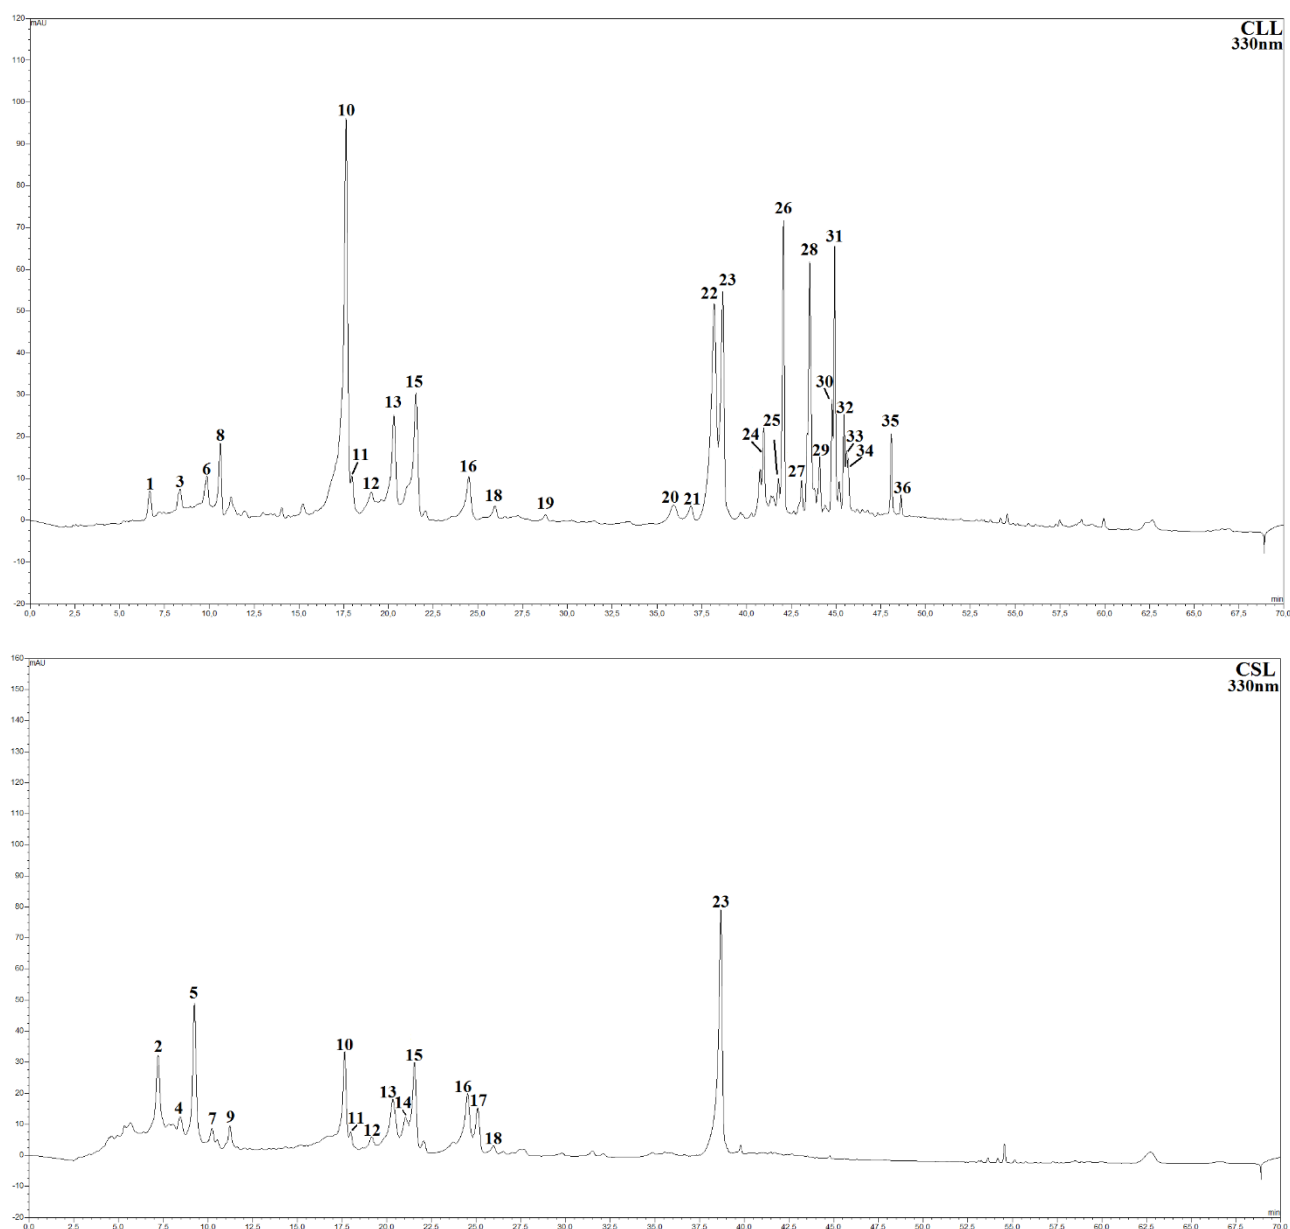

**Figure S1.** HPLC/DAD chromatograms, visualized at 330nm, of the *Cistus* spp. crude extracts object of this study. Peak numbers correspond to table 2.

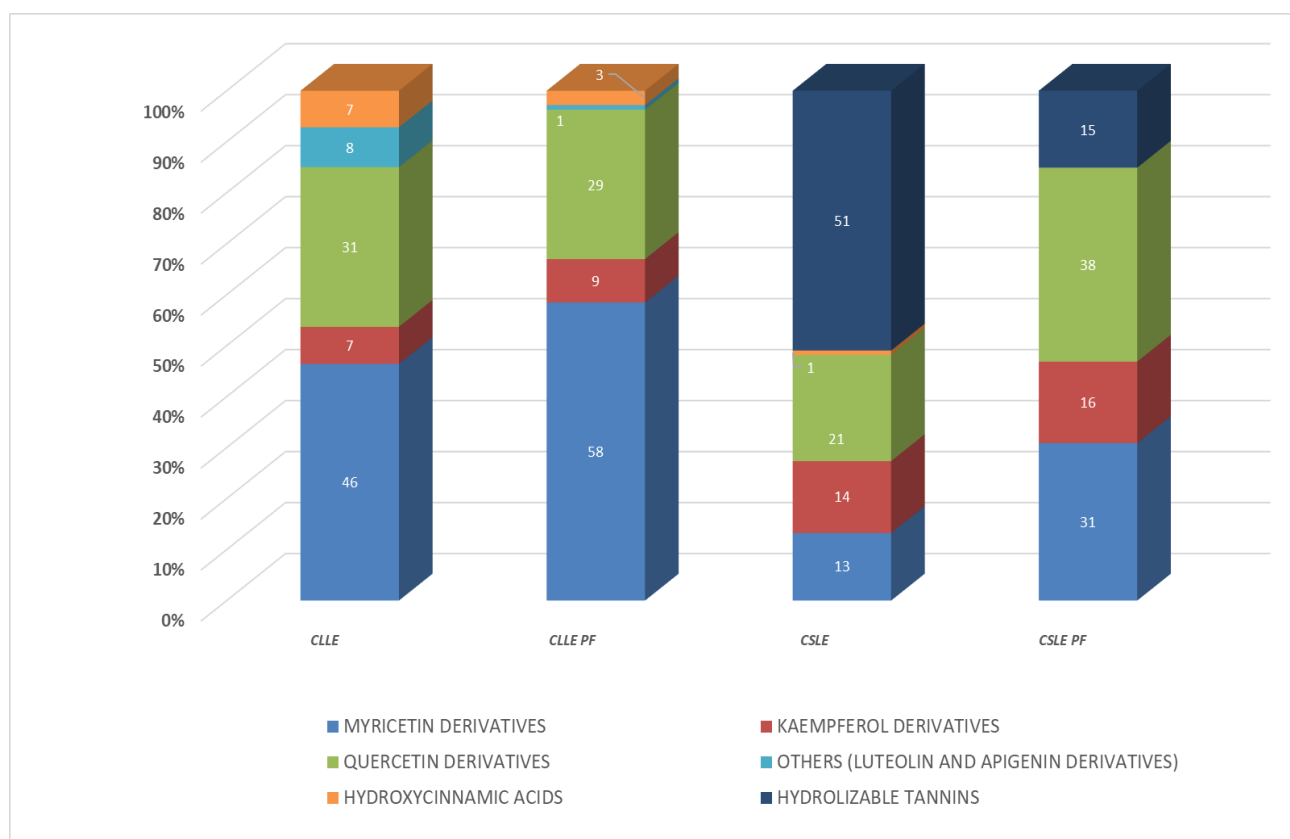

**Figure S2.** Composition (%) in polyphenols, divided into biochemical subclasses, of the *Cistus* spp. extracts. See text for details.
